# Supplementary material for: CSF IgA NMDAR antibodies are potential biomarkers for teratomas in anti-NMDAR encephalitis
Source: PubMed Central journal article supplement — Neurol Neuroimmunol Neuroinflamm. 2015 Oct 29;2(6):e166. doi: 10.1212/NXI.0000000000000166 (PMC4630685; doi:10.1212/nxi.0000000000000166), 2015-10-29
Supplement: supp_2.6.e166_Fig_e-1_Desestret.pdf [file supp_2.6.e166_Fig_e-1_Desestret.pdf]

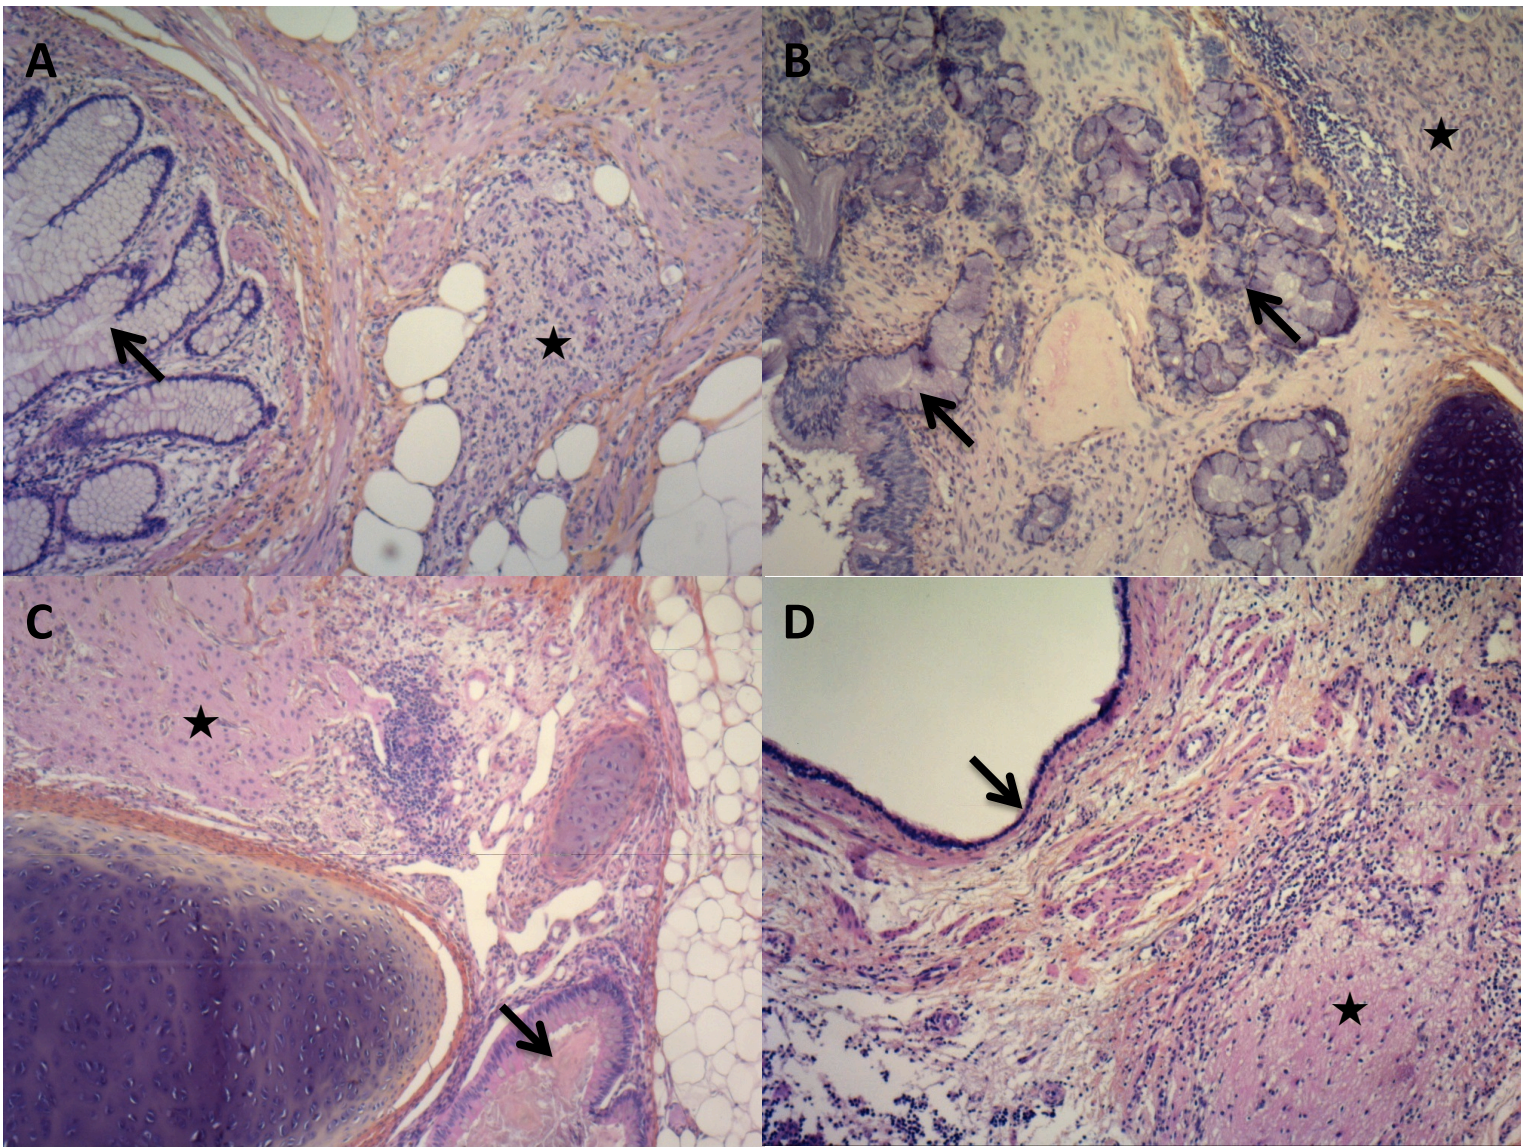

**Figure e-1. Histopathology of ovarian teratomas**

Examples of 4 ovarian teratomas in patients with NMDAR-Ab encephalitis with (A and B) and without (C and D) IgA-NMDAR-Abs. Neuroglial components (stars) were present in the mucosa epithelia (arrows) in all four cases. Intestinal epithelium was observed in A, B and C, and ciliate epithelium was observed in D. Hematoxylin -phloxine-saffron staining (X50).
